# Supplementary material for: Effects of CoQ10 Replacement Therapy on the Audiological Characteristics of Pediatric Patients with COQ6 Variants
Source: Hindawi journal article supplement (doi:10.1155/2022/5250254), 2022-01-01
Supplement: f1 [file 5250254.f1.pdf]

## Effects of CoQ10 replacement therapy on the audiological characteristics of pediatric patients with *COQ6* variants

Dong Woo Nam, Sang Soo Park, So Min Lee, Myung-Whan Suh, Moo Kyun Park, Jae-Jin Song, Byung Yoon Choi, Jun Ho Lee, Seung Ha Oh, Kyung Chul Moon, Yo Han Ahn, Hee Gyung Kang, Hae Il Cheong, Ji Hyun Kim, Sang-Yeon Lee

### Fig.S1

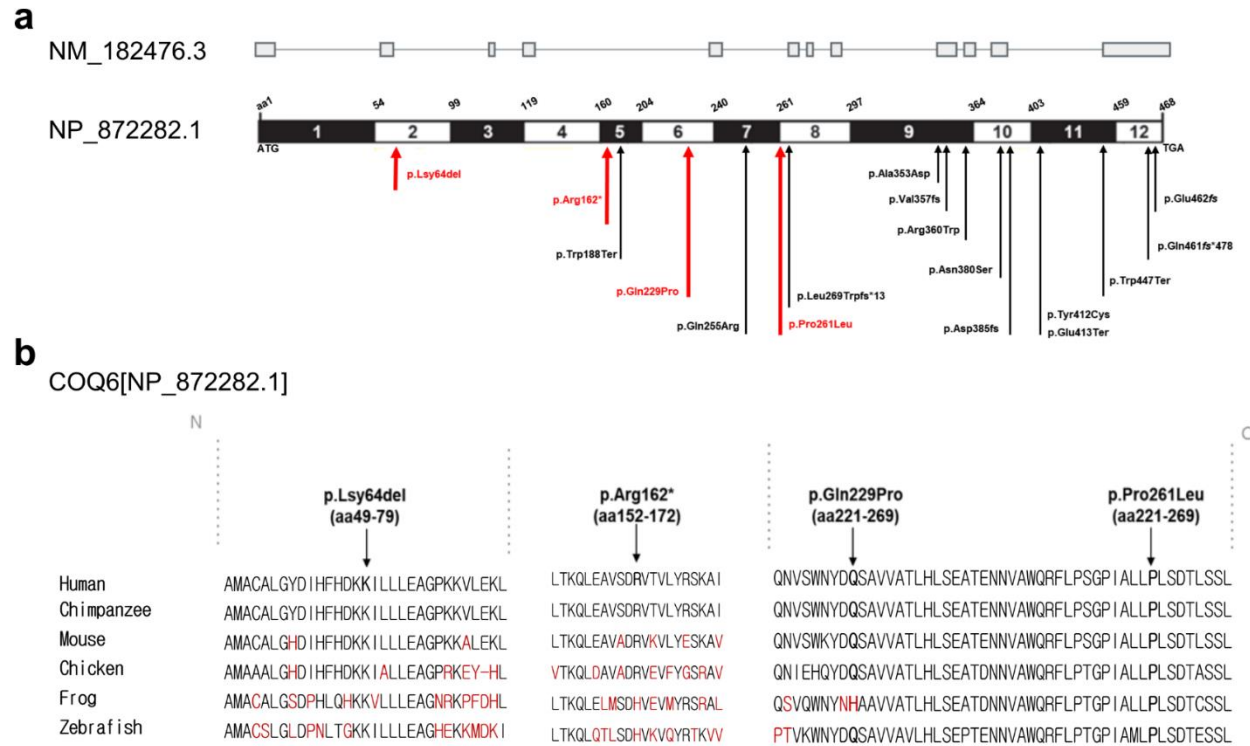

**Supplementary figure S1.** Genotypes and domain maps of *COQ6* variants. (a) Exon structures of *COQ6* cDNA and the variants. Variants encountered in our cohort are colored red. (b) Conservation of the affected residues (arrows) among species was documented for all *COQ6* variants observed in the present study.
