# Supplementary material for: Effects of CoQ10 Replacement Therapy on the Audiological Characteristics of Pediatric Patients with COQ6 Variants
Source: Hindawi journal article supplement (doi:10.1155/2022/5250254), 2022-01-01
Supplement: f5 [file 5250254.f5.pdf]

## Effects of CoQ10 replacement therapy on the audiological characteristics of pediatric patients with *COQ6* variants

Dong Woo Nam, Sang Soo Park, So Min Lee, Myung-Whan Suh, Moo Kyun Park, Jae-Jin Song, Byung Yoon Choi, Jun Ho Lee, Seung Ha Oh, Kyung Chul Moon, Yo Han Ahn, Hee Gyung Kang, Hae Il Cheong, Ji Hyun Kim, Sang-Yeon Lee

### Table.S5

Supplementary table S5. Effect of renal function on the extent of hearing deterioration

|                                                                    | Patient 7     | Patient 8-1   | Patient 9     | Patient 11   |
|--------------------------------------------------------------------|---------------|---------------|---------------|--------------|
| <i>COQ6</i> Genotype                                               | Q229P/ P261L  | K64del/ P261L | Q229P/ P261L  | P261L/ P261L |
| Change of renal function after CoQ10 administration                | Aggravated    | Aggravated    | Improved      | Not changed  |
| Classification of hearing after CoQ10 administration               | Non-responder | Responder     | Non-responder | Responder    |
| Correlation of renal function with extent of hearing deterioration | Possible      | No            | No            | No           |

Note: Four patients were possible to analyze how CoQ10 supplement therapy affects not only hearing but also kidney function simultaneously. As for Patient 1-6, the renal function was in progress to ESKD before CoQ10 administration. As for Patient 8-2 and Patient 10, audiological follow-up was not available for more than 1 year after CoQ10 administration, thereby excluding from this analysis.
